# Supplementary material for: Helium/Argon-Generated Cold Atmospheric Plasma Facilitates Cutaneous Wound Healing
Source: PubMed Central journal article supplement (PMC7338308; doi:10.3389/fbioe.2020.00683), 2020-06-30

**Fig. S1**

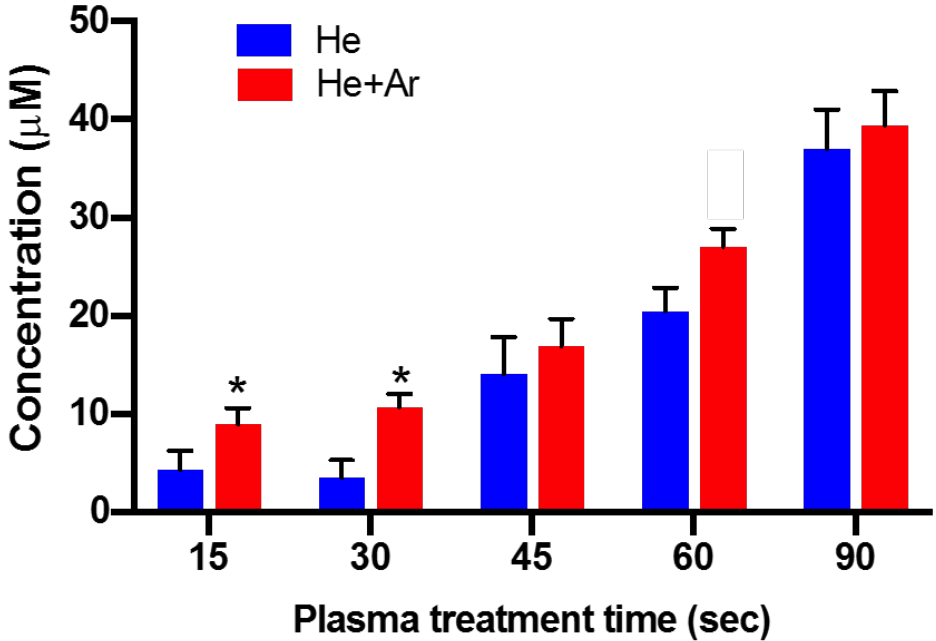

**Fig. S2**

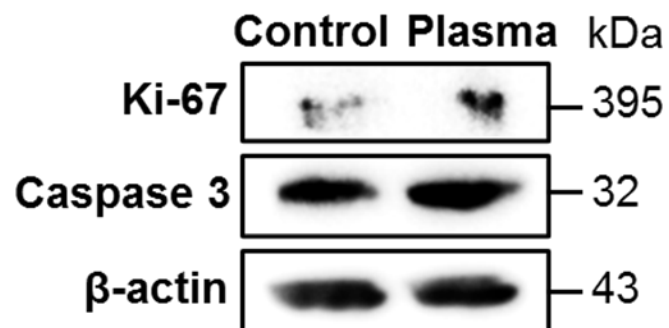

# Fig. S3

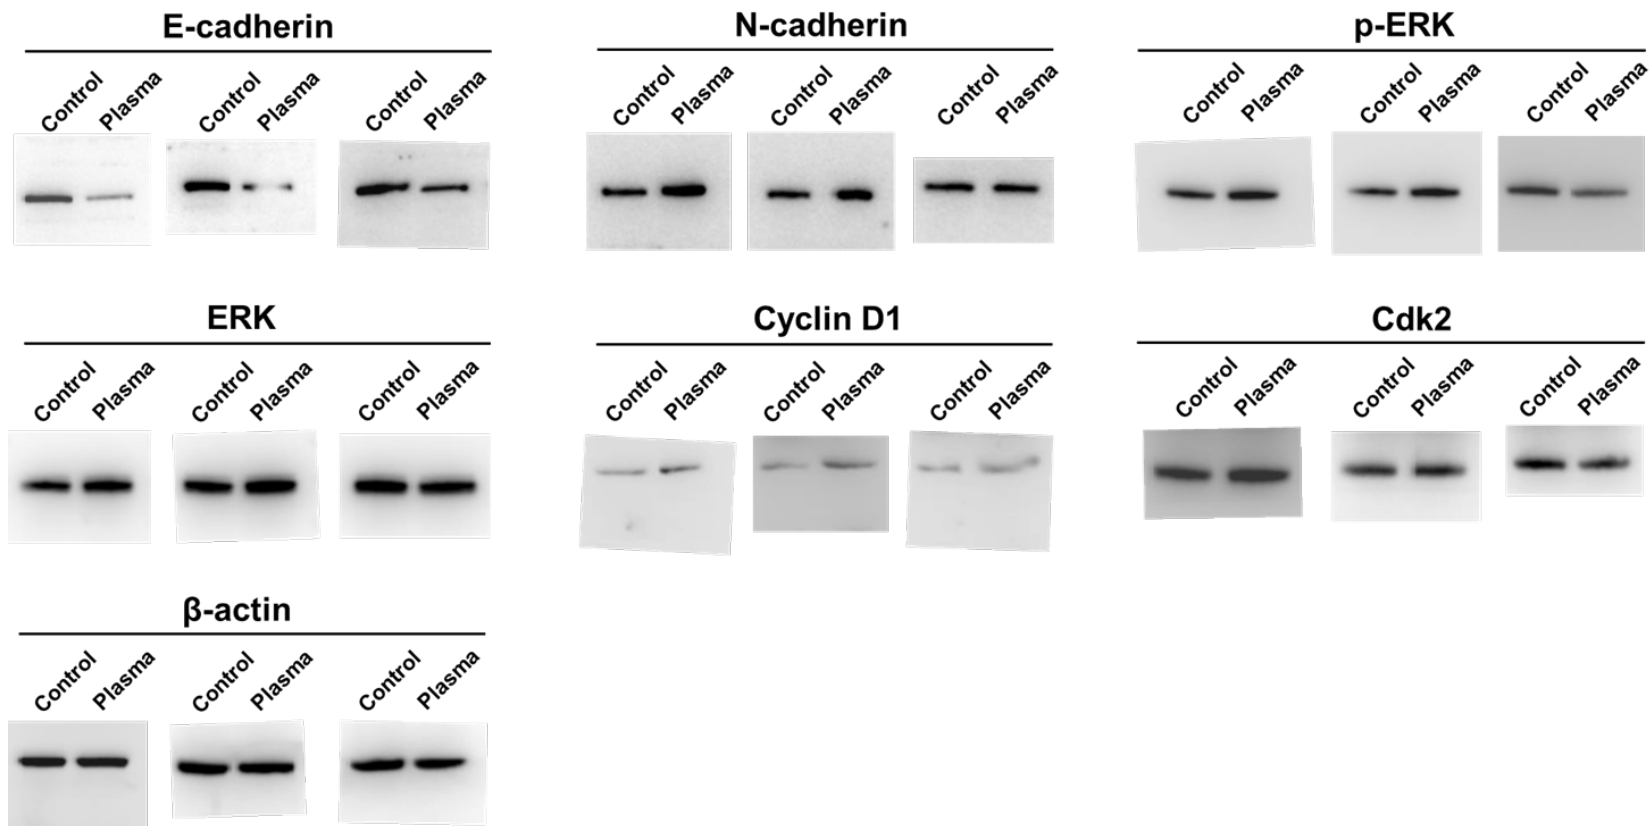

Supplement: Image_1.pdf [file Image_1.pdf]
